# Supplementary material for: Trend in Breakfast Consumption among Primary School Children in Italy
Source: MDPI journal article supplement (doi:10.3390/nu15214632), 2023-10-31
Supplement: s1 [file s1]

## Supplementary S1: Children's questionnaire- breakfast's section

Italian version and English version

|          |                                                                                                                                                                                                                                                                             |                                                                                                                                                                                                                                                                                                                  |                                                                                                                                                                                                                                   |
|----------|-----------------------------------------------------------------------------------------------------------------------------------------------------------------------------------------------------------------------------------------------------------------------------|------------------------------------------------------------------------------------------------------------------------------------------------------------------------------------------------------------------------------------------------------------------------------------------------------------------|-----------------------------------------------------------------------------------------------------------------------------------------------------------------------------------------------------------------------------------|
| <b>1</b> | Hai fatto colazione questa mattina?                                                                                                                                                                                                                                         | <input type="checkbox"/> Sì <input type="checkbox"/> No                                                                                                                                                                                                                                                          |                                                                                                                                                 |
| <b>2</b> | Se, prima di venire a scuola, hai fatto colazione, segna con una crocetta tutto quello che hai mangiato e bevuto questa mattina:                                                                                                                                            |                                                                                                                                                                                                                                                                                                                  |                                                                                                                                                                                                                                   |
|          | <input type="checkbox"/> latte<br><input type="checkbox"/> latte con cacao o orzo<br><input type="checkbox"/> tè<br><input type="checkbox"/> succo di frutta<br><input type="checkbox"/> spremuta<br><input type="checkbox"/> cornetto<br><input type="checkbox"/> brioches | <input type="checkbox"/> merendina<br><input type="checkbox"/> biscotti<br><input type="checkbox"/> panino farcito o toast<br><input type="checkbox"/> pane e marmellata<br><input type="checkbox"/> pane e nutella<br><input type="checkbox"/> pizza o focaccia<br><input type="checkbox"/> crackers o grissini | <input type="checkbox"/> fette biscottate<br><input type="checkbox"/> torta o crostata<br><input type="checkbox"/> yogurt<br><input type="checkbox"/> cereali<br><input type="checkbox"/> frutta<br><input type="checkbox"/> uova |
| <b>3</b> | Se questa mattina, prima di venire a scuola, hai mangiato o bevuto altre cose a colazione, oltre quelle indicate sopra, scrivile sulla linea                                                                                                                                |                                                                                                                                                                                                                                                                                                                  |                                                                                                                                                                                                                                   |
|          | <hr/>                                                                                                                                                                                                                                                                       |                                                                                                                                                                                                                                                                                                                  |                                                                                                                                                                                                                                   |

1. Did you have breakfast this morning?

- ☐ Yes
- ☐ No

2. If you had breakfast before coming to school, please put a tick on everything you had this morning:

- ☐ milk
- ☐ biscuits
- ☐ yoghurt
- ☐ chocolate milk or barley
- ☐ sandwich
- ☐ tea
- ☐ bread with jelly
- ☐ a piece of fruit
- ☐ fruit juice
- ☐ bread with chocolate spread
- ☐ eggs
- ☐ fresh squeezed juice
- ☐ pizza or focaccia
- ☐ cereals
- ☐ cornetto
- ☐ crackers or bread sticks
- ☐ brioches
- ☐ crispy toast-like bread
- ☐ snack
- ☐ cake or fruit tart

3. If this morning you ate or drank something else for breakfast besides the things listed above, please make a list on the line below

---
